# Supplementary material for: Post‐Procedural Troponin Elevation and Clinical Outcomes Following Transcatheter Aortic Valve Implantation
Source: PubMed Central journal article supplement — J Am Heart Assoc. 2016 Feb 19;5(2):e002430. doi: 10.1161/JAHA.115.002430 (PMC4802442; doi:10.1161/jaha.115.002430), 2016-02-19

## **Supplemental Material**

### **Post-procedural Troponin Elevation and Clinical Outcomes Following Transcatheter Aortic Valve Implantation**

Konstantinos C. Koskinas, MD; Stefan Stortecky, MD; Anna Franzone, MD;  
Crochan J. O'Sullivan, MD; Fabien Praz, MD; Katazyrna Zuk, MD; Lorenz Räber, MD;  
Thomas Pilgrim, MD; Aris Moschovitis, MD; Georg M. Fiedler, MD; Peter Jüni, MD;  
Dik Heg, PhD; Peter Wenaweser, MD; Stephan Windecker, MD

## Supplemental Tables

**Table S1.** Univariate and multivariate predictors of post-TAVI peak troponin levels.

| Variable                         | Univariate analysis         |         | Multivariate analysis       |         |
|----------------------------------|-----------------------------|---------|-----------------------------|---------|
|                                  | Linear Estimate<br>(95% CI) | p-value | Linear Estimate<br>(95% CI) | p-value |
| Weight (kg)                      | 0.005 (-0.001 to 0.011)     | 0.099   | 0.010 (0.005 to 0.014)      | <0.001  |
| Diabetes mellitus                | 0.174 (-0.018 to 0.367)     | 0.076   |                             |         |
| Syntax Score                     | 0.010 (-0.001 to 0.021)     | 0.075   |                             |         |
| History of myocardial infarction | 0.549 (0.314 to 0.784)      | <0.001  | 0.216 (0.012 to 0.421)      | 0.038   |
| History of PCI                   | 0.143 (-0.053 to 0.340)     | 0.154   |                             |         |
| Renal dysfunction                | 0.131 (0.021 to 0.242)      | 0.021   |                             |         |
| Logistic Euro Score              | 0.015 (0.009 to 0.021)      | <0.001  |                             |         |
| STS score                        | 0.086 (0.072 to 0.101)      | <0.001  | 0.089 (0.074 to 0.103)      | <0.001  |
| Transapical access               | 0.266 (0.046 to 0.486)      | 0.018   | 0.277 (0.093 to 0.462)      | 0.003   |

PCI indicates percutaneous coronary intervention.

**Table S2.** Invasive hemodynamic characteristics in patients with or without periprocedural myocardial injury.

|                                                                     | <b>cTnT ≤15x UNL</b><br>n=239 | <b>CTnT &gt;15x UNL</b><br>n=338 | <b>p-value</b> |
|---------------------------------------------------------------------|-------------------------------|----------------------------------|----------------|
| <b>Aortic stenosis severity</b>                                     |                               |                                  |                |
| Aortic valve area (cm <sup>2</sup> )                                | 0.61 ± 0.26                   | 0.60 ± 0.29                      | 0.82           |
| Peak-to-peak gradient (mm Hg)                                       | 55.68 ± 29.90                 | 57.66 ± 28.69                    | 0.42           |
| Mean gradient (mm Hg)                                               | 42.54 ± 19.08                 | 43.71 ± 16.63                    | 0.43           |
| Stroke work loss (%)                                                | 23.66 ± 8.08                  | 24.64 ± 7.77                     | 0.22           |
| Valvular resistance (dyne.s.cm <sup>-5</sup> )                      | 309.43 ± 185.51               | 345.99 ± 222.33                  | 0.08           |
| <b>Systemic vascular load</b>                                       |                               |                                  |                |
| Systolic arterial pressure (mm Hg)                                  | 137.18 ± 27.41                | 134.91 ± 28.81                   | 0.40           |
| Diastolic arterial pressure (mm Hg)                                 | 67.40 ± 13.68                 | 64.27 ± 14.01                    | 0.02           |
| Mean arterial pressure (mm Hg)                                      | 95.52 ± 16.99                 | 92.50 ± 18.16                    | 0.07           |
| Systemic vascular resistance (dyne.s.cm <sup>-5</sup> )             | 1951.37 ± 621.84              | 1953.49 ± 678.27                 | 0.97           |
| Systemic arterial compliance (mL. mm Hg <sup>-1</sup> )             | 0.44 ± 0.21                   | 0.43 ± 0.17                      | 0.43           |
| <b>LV global afterload</b>                                          |                               |                                  |                |
| Valvuloarterial Impedance (mm Hg.ml <sup>-1</sup> .m <sup>2</sup> ) | 7.35 ± 2.56                   | 7.35 ± 2.57                      | 0.99           |
| <b>LV systolic function</b>                                         |                               |                                  |                |
| Ejection fraction (%)                                               | 52.13 ± 15.46                 | 54.64 ± 14.06                    | 0.045          |
| LV systolic pressure (mm Hg)                                        | 188.58 ± 35.77                | 188.18 ± 33.80                   | 0.90           |
| LV end diastolic pressure (mm Hg)                                   | 21.62 ± 7.77                  | 21.34 ± 8.34                     | 0.72           |
| LV stroke work (g.m)                                                | 94.70 ± 33.71                 | 90.48 ± 32.34                    | 0.20           |
| Stroke volume (ml)                                                  | 49.69 ± 14.57                 | 49.48 ± 16.78                    | 0.89           |
| Stroke volume index (ml/m <sup>2</sup> )                            | 27.58 ± 7.64                  | 27.89 ± 8.37                     | 0.69           |
| Cardiac output (L/min)                                              | 3.84 ± 1.03                   | 3.74 ± 1.02                      | 0.32           |
| Cardiac index (l/(min*m <sup>2</sup> ))                             | 2.13 ± 0.53                   | 2.11 ± 0.50                      | 0.74           |
| <b>Right sided hemodynamics</b>                                     |                               |                                  |                |
| PA systolic pressure (mm Hg)                                        | 52.13 ± 16.84                 | 50.95 ± 17.38                    | 0.48           |
| Mean PA pressure (mm Hg)                                            | 33.55 ± 11.39                 | 32.77 ± 11.92                    | 0.49           |
| Pulmonary hypertension, n (%)                                       | 146 (76)                      | 175 (74)                         | 0.50           |
| Pulmonary vascular resistance (dyne.s.cm <sup>-5</sup> )            | 316.43 ± 192.90               | 279.69 ± 189.36                  | 0.20           |

LV indicates left ventricular; PA: pulmonary artery.

**Table S3.** Predictors of 30-day mortality.

|                     | Univariate effects |         | Multivariate effects |         |
|---------------------|--------------------|---------|----------------------|---------|
|                     | HR (95% CI)        | P-value | HR (95% CI)          | P-value |
| Age (years)         | 1.09 (1.01-1.18)   | 0.028   | 1.06 (0.97-1.14)     | 0.18    |
| Gender (female)     | 0.72 (0.35-1.47)   | 0.361   |                      |         |
| COPD                | 1.65 (0.74-3.67)   | 0.220   |                      |         |
| Renal dysfunction   | 3.14 (1.10-8.98)   | 0.033   | 2.29 (0.96-6.85)     | 0.13    |
| Atrial fibrillation | 1.63 (0.73-3.62)   | 0.234   |                      |         |
| Logistic EuroScore  | 1.03 (1.01-1.05)   | 0.010   |                      |         |
| STS score           | 1.07 (1.03-1.11)   | <0.001  | 1.04 (0.99-1.10)     | 0.14    |

Model based on all-cause death within 30 days of follow-up, selecting variables with  $p < 0.2$  univariable effect on death at 30 days.

**Table S4.** Sensitivity analysis of 2-year clinical outcomes in relation to post-TAVI troponin >15x ULN vs. ≤15x ULN including patients without renal dysfunction, defined as estimated glomerular filtration rate <60ml/min/1.73m<sup>2</sup> (n=181).

|                                   | <b>cTnT ≤15x UNL</b><br>n=94 | <b>cTnT &gt;15x UNL</b><br>n=87 | <b>Hazard Ratio</b><br><b>(95% CI)</b> | <b>p value</b> | <b>Adjusted Hazard</b><br><b>Ratio (95% CI)</b> | <b>Adjusted p</b><br><b>value</b> |
|-----------------------------------|------------------------------|---------------------------------|----------------------------------------|----------------|-------------------------------------------------|-----------------------------------|
| Death, n (%)                      | 14 (15.5)                    | 24 (28.6)                       | 2.02 (1.05-3.91)                       | 0.036          | 2.14 (1.10-4.16)                                | 0.026                             |
| Cardiovascular death, n (%)       | 7 (8.4)                      | 13 (16.5)                       | 2.19 (0.87-5.49)                       | 0.09           | 2.41 (0.95-6.09)                                | 0.06                              |
| Cerebrovascular events, n (%)     | 3 (3.7)                      | 5 (7.2)                         | 2.03 (0.49-8.51)                       | 0.33           | 1.81 (0.42-7.87)                                | 0.43                              |
| Major stroke                      | 3 (3.7)                      | 3 (4.1)                         | 1.20 (0.24-5.93)                       | 0.83           | 0.96 (0.18-5.12)                                | 0.96                              |
| Minor stroke                      | 0 (0.0)                      | 1 (1.5)                         | 3.24 (0.13-78.49)                      | 0.48           |                                                 |                                   |
| Transient ischemic attack         | 0 (0.0)                      | 1 (1.5)                         | 3.24 (0.13-78.49)                      | 0.48           |                                                 |                                   |
| Myocardial infarction, n (%)      | 1 (1.1)                      | 2 (2.8)                         | 2.44 (0.22-26.95)                      | 0.47           | 2.41 (0.21-27.86)                               | 0.48                              |
| Death or major stroke, n (%)      | 15 (16.5)                    | 28 (33.4)                       | 2.26 (1.21-4.23)                       | 0.01           | 2.36 (1.25-4.45)                                | 0.008                             |
| Death, major stroke, or MI, n (%) | 16 (17.6)                    | 29 (34.6)                       | 2.20 (1.20-4.05)                       | 0.01           | 2.30 (1.24-4.27)                                | 0.008                             |

Depicted are number of first events (% cumulative incidence), hazard ratios (HR) with respective 95% confidence intervals from Cox's regressions. Adjusted HR were obtained after adjusting for age and STS score. Age and STS score had a p<0.2 univariable effect on the primary outcome all-cause death.

**Table S5.** Sensitivity analysis of 2-year clinical outcomes in relation to post-TAVI troponin >15x ULN vs. ≤15x ULN including patients who did not undergo concomitant PCI (n=486).

|                                   | <b>cTnT ≤15x UNL</b><br>n=202 | <b>cTnT &gt;15x UNL</b><br>n=284 | <b>Hazard Ratio</b><br><b>(95% CI)</b> | <b>p value</b> | <b>Adjusted Hazard</b><br><b>Ratio (95% CI)</b> | <b>Adjusted p</b><br><b>value</b> |
|-----------------------------------|-------------------------------|----------------------------------|----------------------------------------|----------------|-------------------------------------------------|-----------------------------------|
| Death, n (%)                      | 35 (18.0)                     | 86 (31.5)                        | 1.96 (1.32-2.90)                       | 0.001          | 1.84 (1.23-2.74)                                | 0.003                             |
| Cardiovascular death, n (%)       | 22 (11.6)                     | 59 (22.3)                        | 2.12 (1.30-3.46)                       | 0.003          | 1.92 (1.17-3.16)                                | 0.01                              |
| Cerebrovascular events, n (%)     | 13 (7.0)                      | 22 (8.8)                         | 1.30 (0.65-2.57)                       | 0.46           | 1.24 (0.62-2.49)                                | 0.54                              |
| Major stroke                      | 7 (3.8)                       | 17 (6.3)                         | 1.84 (0.76-4.44)                       | 0.17           | 1.83 (0.75-4.46)                                | 0.18                              |
| Minor stroke                      | 2 (1.0)                       | 1 (0.5)                          | 0.39 (0.04-4.31)                       | 0.44           | 0.39 (0.03-4.43)                                | 0.45                              |
| Transient ischemic attack         | 4 (2.2)                       | 3 (1.6)                          | 0.59 (0.13-2.64)                       | 0.49           | 0.50 (0.11-2.26)                                | 0.36                              |
| Myocardial infarction, n (%)      | 2 (1.1)                       | 9 (3.8)                          | 3.57 (0.77-16.53)                      | 0.10           | 3.30 (0.69-15.70)                               | 0.13                              |
| Death or major stroke, n (%)      | 39 (20.1)                     | 94 (34.3)                        | 1.93 (1.33-2.81)                       | 0.001          | 1.84 (1.26-2.69)                                | 0.002                             |
| Death, major stroke, or MI, n (%) | 39 (20.1)                     | 99 (36.1)                        | 2.07 (1.43-3.00)                       | 0.0001         | 1.98 (1.36-2.89)                                | 0.0004                            |

Depicted are number of first events (% cumulative incidence), hazard ratios (HR) with respective 95% confidence intervals from Cox's regressions. Adjusted HR were obtained after adjusting for age, renal dysfunction and STS score. Age, renal dysfunction and STS score had a p<0.2 univariable effect on the primary outcome all-cause death.

**Table S6.** Sensitivity analysis of 2-year clinical outcomes in relation to post-TAVI troponin >15x ULN vs. ≤15x ULN including patients who did not undergo TAVI via the trans-apical route PCI (n=471).

|                                   | <b>cTnT ≤15x UNL</b><br>n=239 | <b>cTnT &gt;15x UNL</b><br>n=232 | <b>Hazard Ratio</b><br><b>(95% CI)</b> | <b>p value</b> | <b>Adjusted Hazard</b><br><b>Ratio (95% CI)</b> | <b>Adjusted p</b><br><b>value</b> |
|-----------------------------------|-------------------------------|----------------------------------|----------------------------------------|----------------|-------------------------------------------------|-----------------------------------|
| Death, n (%)                      | 39 (17.0)                     | 73 (32.6)                        | 2.22 (1.50-3.27)                       | 0.000          | 2.00 (1.34-2.98)                                | 0.001                             |
| Cardiovascular death, n (%)       | 25 (11.1)                     | 53 (24.5)                        | 2.49 (1.55-4.01)                       | 0.000          | 2.05 (1.25-3.35)                                | 0.004                             |
| Cerebrovascular events, n (%)     | 14 (6.3)                      | 17 (8.3)                         | 1.37 (0.67-2.78)                       | 0.39           | 1.17 (0.57-2.42)                                | 0.67                              |
| Major stroke                      | 8 (3.6)                       | 13 (5.7)                         | 1.80 (0.74-4.33)                       | 0.19           | 1.51 (0.62-3.73)                                | 0.37                              |
| Minor stroke                      | 2 (0.9)                       | 1 (0.6)                          | 0.58 (0.05-6.38)                       | 0.65           | 0.60 (0.05-6.87)                                | 0.68                              |
| Transient ischemic attack         | 4 (1.8)                       | 2 (1.4)                          | 0.59 (0.11-3.20)                       | 0.54           | 0.49 (0.09-2.79)                                | 0.42                              |
| Myocardial infarction, n (%)      | 2 (0.9)                       | 7 (3.5)                          | 4.08 (0.85-19.64)                      | 0.08           | 3.97 (0.79-20.05)                               | 0.09                              |
| Death or major stroke, n (%)      | 44 (19.1)                     | 77 (34.3)                        | 2.08 (1.43-3.01)                       | 0.000          | 1.86 (1.27-2.73)                                | 0.001                             |
| Death, major stroke, or MI, n (%) | 44 (19.1)                     | 80 (35.5)                        | 2.20 (1.52-3.17)                       | 0.000          | 2.00 (1.37-2.92)                                | 0.000                             |

Depicted are number of first events (% cumulative incidence), hazard ratios (HR) with respective 95% confidence intervals from Cox's regressions. Adjusted HR were obtained after adjusting for age, renal dysfunction and STS score. Age, renal dysfunction and STS score had a p<0.2 univariable effect on the primary outcome all-cause death.

**Table S7.** Clinical outcomes at 30 days and 2 years in relation to *pre*-TAVI troponin >1x ULN vs. ≤1x UNL.

|                                   | cTnT ≤1x UNL<br>n=64 | cTnT >1x UNL<br>n=192 | Hazard Ratio<br>(95% CI) | p value | Adjusted Hazard<br>Ratio (95% CI) | Adjusted p<br>value |
|-----------------------------------|----------------------|-----------------------|--------------------------|---------|-----------------------------------|---------------------|
| <b>30 Days</b>                    |                      |                       |                          |         |                                   |                     |
| Death, n (%)                      | 0 (0.0)              | 13 (6.8)              | 9.05 (0.55-150.10)       | 0.04    |                                   |                     |
| Cardiovascular death, n (%)       | 0 (0.0)              | 13 (6.8)              | 9.05 (0.55-150.10)       | 0.04    |                                   |                     |
| Cerebrovascular events            | 2 (3.1)              | 6 (3.1)               | 1.00 (0.20-4.96)         | 0.99    | 0.78 (0.15-4.23)                  | 0.78                |
| Major stroke, n (%)               | 0 (0.0)              | 5 (2.6)               | 3.69 (0.21-65.82)        | 0.34    |                                   |                     |
| Minor stroke, n (%)               | 1 (1.6)              | 0 (0.0)               | 0.11 (0.00-2.67)         | 0.25    |                                   |                     |
| Transient ischemic attack, n (%)  | 1 (1.6)              | 1 (0.5)               | 0.33 (0.02-5.34)         | 0.44    | 0.14 (0.00-4.02)                  | 0.25                |
| Myocardial infarction, n (%)      | 0 (0.0)              | 2 (1.1)               | 1.68 (0.08-34.54)        | 1.00    |                                   |                     |
| Death or major stroke, n (%)      | 1 (1.6)              | 14 (7.3)              | 4.75 (0.62-36.09)        | 0.13    | 4.35 (0.56-33.98)                 | 0.16                |
| Death, major stroke, or MI, n (%) | 0 (0.0)              | 15 (7.8)              | 10.39 (0.63-171.20)      | 0.026   |                                   |                     |
| <b>2 Years</b>                    |                      |                       |                          |         |                                   |                     |
| Death, n(%)                       | 7 (11.7)             | 51 (30.2)             | 2.86 (1.30-6.31)         | 0.009   | 2.52 (1.13-5.63)                  | 0.02                |
| Cardiovascular death, n (%)       | 3 (4.9)              | 38 (22.7)             | 4.87 (1.50-15.80)        | 0.008   | 4.10 (1.25-13.48)                 | 0.02                |
| Cerebrovascular events            | 5 (8.8)              | 10 (5.9)              | 0.73 (0.25-2.13)         | 0.56    | 0.77 (0.26-2.31)                  | 0.65                |
| Major stroke, n (%)               | 3 (5.7)              | 8 (4.5)               | 1.00 (0.26-3.78)         | 1.000   | 1.19 (0.31-4.53)                  | 0.79                |
| Minor stroke, n (%)               | 1 (1.6)              | 0 (0.0)               | 0.11 (0.00-2.67)         | 0.25    |                                   |                     |
| Transient ischemic attack, n (%)  | 1 (1.6)              | 2 (1.4)               | 0.72 (0.07-7.98)         | 0.79    | 0.49 (0.04-6.64)                  | 0.59                |
| Myocardial infarction, n (%)      | 0 (0.0)              | 8 (5.1)               | 5.70 (0.33-97.38)        | 0.21    |                                   |                     |
| Death or major stroke, n (%)      | 10 (16.8)            | 52 (30.6)             | 2.01 (1.02-3.95)         | 0.04    | 1.83 (0.92-3.64)                  | 0.08                |
| Death, major stroke, or MI, n (%) | 9 (15.2)             | 58 (33.8)             | 2.58 (1.28-5.21)         | 0.008   | 2.38 (1.17-4.84)                  | 0.018               |

Depicted are number of first events (% cumulative incidence), hazard ratios (HR) with respective 95% confidence intervals from Cox's regressions. Adjusted HR were obtained after adjusting for age, renal dysfunction and STS score.



**Figure S1.** Cumulative event curves for all-cause mortality within 2 years in patients with or without post-TAVI troponin T elevation >15x ULN in the subgroups of patients without renal dysfunction (**A**) and without concomitant PCI during the TAVI procedure (**B**).

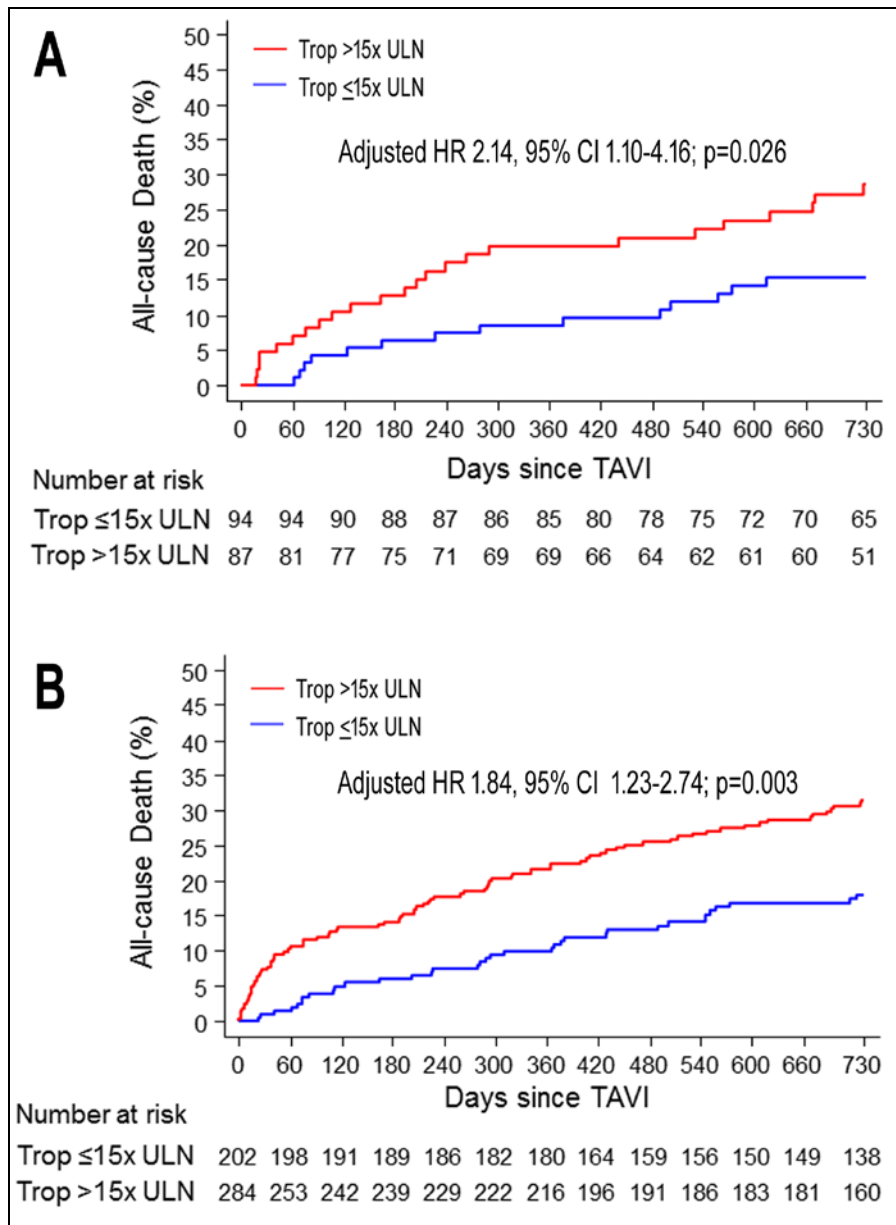

Supplement: JAH3-5-e002430-s001.pdf [file JAH3-5-e002430-s001.pdf]
